# Supplementary material for: Enhanced thermoelectric properties of Pb1−xBixS prepared with hydrothermal synthesis and microwave sintering
Source: Royal Society of Chemistry journal article supplement (doi:10.1039/c6dt04177a), 2017-01-01
Supplement: c6dt04177a1.pdf [file c6dt04177a1.pdf]

## Enhanced thermoelectric properties of $\text{Pb}_{1-x}\text{Bi}_x\text{S}$ prepared with hydrothermal synthesis and microwave sintering

Xueli Du<sup>\*a</sup>, Rongna Shi<sup>a</sup>, Ying Guo<sup>a</sup>, Yuelong Wang<sup>a</sup>, Yongchang Ma<sup>a,b</sup>, and Zhihao Yuan<sup>a,b</sup>

<sup>a</sup>School of Materials Science & Engineering, Tianjin University of Technology, Tianjin 300384, China

<sup>b</sup>Tianjin Key Lab for Photoelectric Materials & Devices, Tianjin University of Technology, Tianjin 300384, China

### SUPPORTING INFORMATION

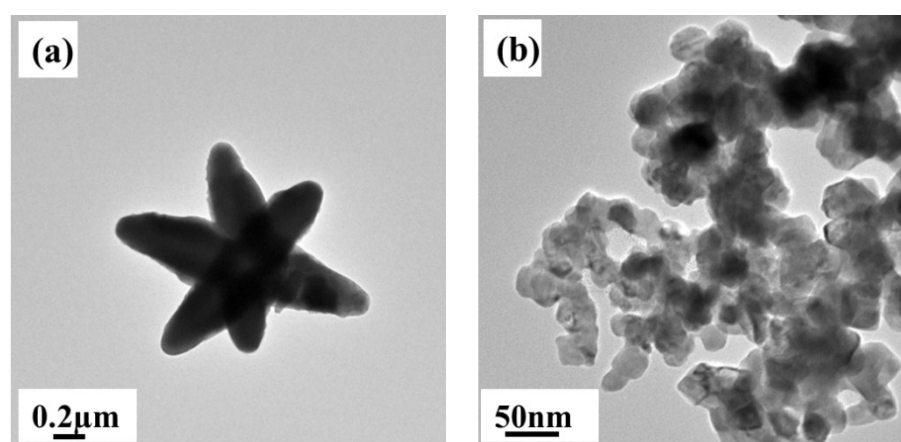

Fig. S1 TEM image of hydrothermally synthesized PbS powder, (a) primary star-shaped structure; (b) secondary nano particles

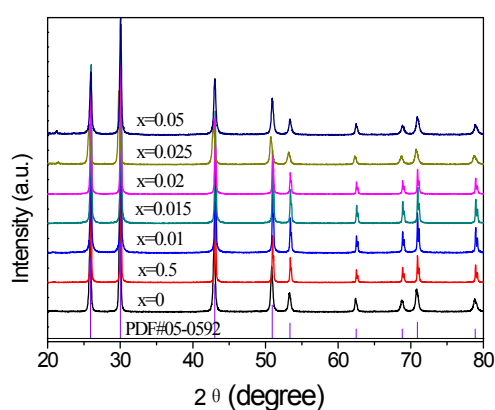

Fig. S2 XRD patterns of hydrothermally synthesized powders for  $\text{Pb}_{1-x}\text{Bi}_x\text{S}$  ( $x=0, 0.005, 0.01, 0.015, 0.02, 0.025, 0.05$ )

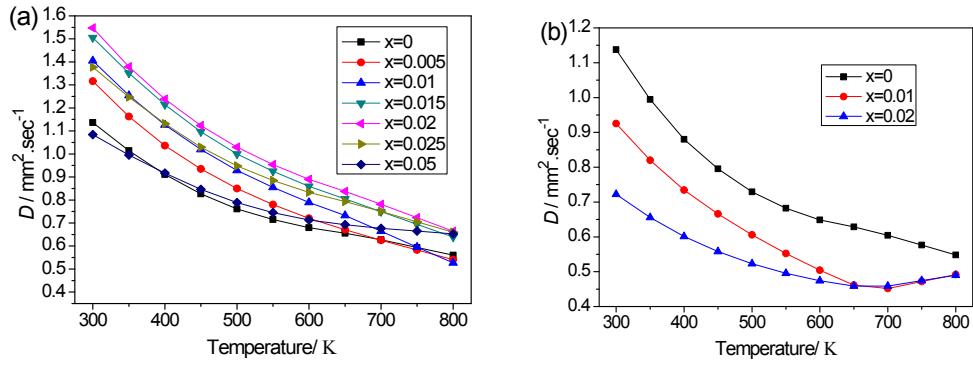

Fig. S3 Temperature dependence of thermal conductivity for microwave (a) and PAS (b) sintered  $Pb_{1-x}Bi_xS$  samples ( $x=0-0.05$ )

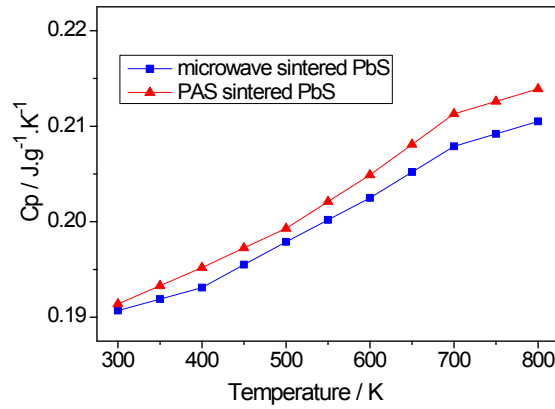

Fig. S4 Cp of microwave and PAS sintered PbS samples

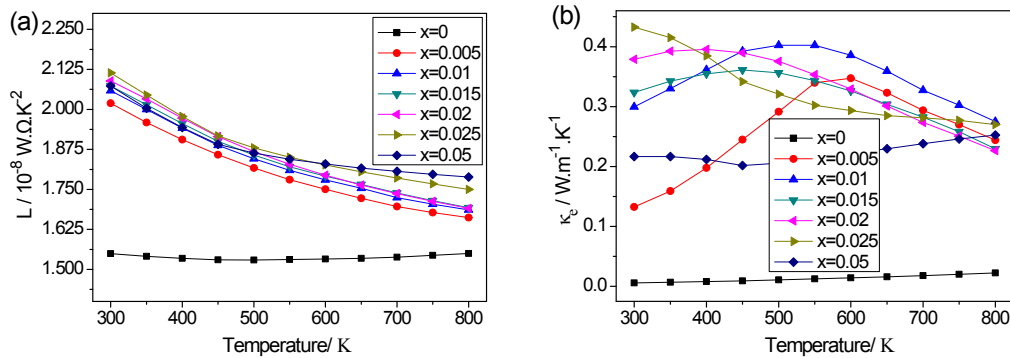

Fig. S5 The Lorenz number (a) and electric thermal conductivity (b) for microwave sintered  $Pb_{1-x}Bi_xS$  samples ( $x=0, 0.005, 0.01, 0.015, 0.02, 0.025, 0.05$ )

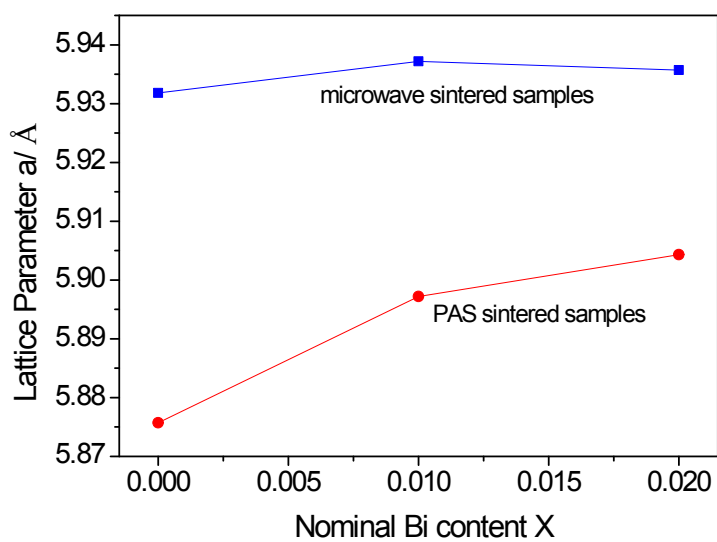

Fig. S6 Lattice parameters of microwave and PAS sintered  $Pb_{1-x}Bi_xS$  samples ( $x=0, 0.01, 0.02$ )

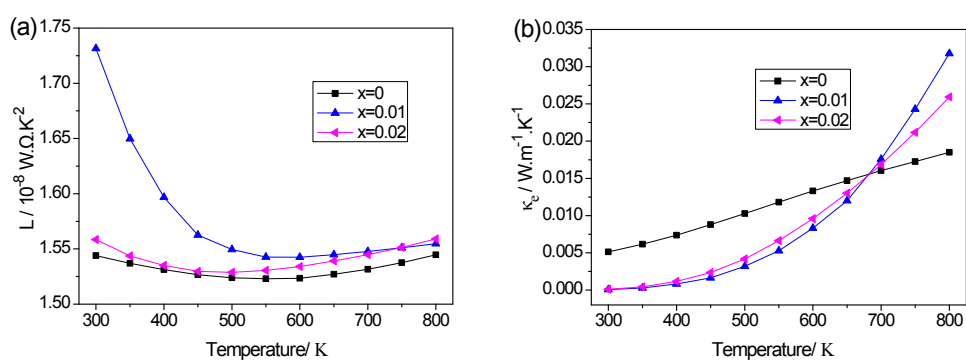

Fig. S7 The Lorenz number (a) and electric thermal conductivity (b) for PAS sintered  $Pb_{1-x}Bi_xS$  samples ( $x=0, 0.01, 0.02$ )
